# Supplementary material for: Associations between adrenal gland volume and adipose tissue compartments – a whole body MRI study
Source: PubMed Central journal article supplement (PMC11234623; doi:10.1186/s12986-024-00823-x), 2024-07-09
Supplement: 12986_2024_823_MOESM1_ESM.pdf [file 12986_2024_823_MOESM1_ESM.pdf]

|                 |       | Model 1 |              |          | Model 2 |              |          | Model 3 |              |          | Model 4 |               |          | Model 5 |               |         |
|-----------------|-------|---------|--------------|----------|---------|--------------|----------|---------|--------------|----------|---------|---------------|----------|---------|---------------|---------|
|                 |       | Est     | 95%-CI       | p-value  |         | 95%-CI       | p-value  |         | 95%-CI       | p-value  |         | 95%-CI        | p-value  |         | 95%-CI        | p-value |
| TAT             | left  | 0.66    | [0.56, 0.77] | 1.83E-28 | 0.63    | [0.52, 0.73] | 6.37E-26 | 0.51    | [0.40, 0.62] | 6.66E-19 | 0.16    | [0.10, 0.23]  | 2.13E-06 | 0.1     | [0.01, 0.18]  | 0.023   |
|                 | right | 0.62    | [0.51, 0.73] | 4.71E-24 | 0.58    | [0.47, 0.69] | 1.34E-21 | 0.45    | [0.33, 0.56] | 2.56E-13 | 0.14    | [0.07, 0.21]  | 6.37E-05 | 0.12    | [0.04, 0.20]  | 0.002   |
| VAT             | left  | 0.58    | [0.49, 0.66] | 1.99E-32 | 0.55    | [0.46, 0.64] | 3.79E-29 | 0.44    | [0.36, 0.52] | 1.36E-21 | 0.29    | [0.20, 0.37]  | 4.13E-11 |         |               |         |
|                 | right | 0.51    | [0.42, 0.60] | 2.70E-24 | 0.48    | [0.39, 0.57] | 1.87E-21 | 0.34    | [0.25, 0.44] | 5.91E-12 | 0.19    | [0.10, 0.28]  | 2.33E-05 |         |               |         |
| SAT             | left  | 0.54    | [0.43, 0.65] | 8.98E-19 | 0.51    | [0.40, 0.62] | 4.43E-17 | 0.42    | [0.30, 0.53] | 5.43E-12 | 0.03    | [-0.04, 0.09] | 4.47E-01 | 0.14    | [0.02, 0.26]  | 0.023   |
|                 | right | 0.52    | [0.41, 0.63] | 2.09E-17 | 0.49    | [0.38, 0.60] | 1.09E-15 | 0.4     | [0.28, 0.52] | 4.07E-10 | 0.06    | [-0.00, 0.13] | 6.24E-02 | 0.18    | [0.06, 0.29]  | 0.002   |
| HFF             | left  | 1.68    | [1.51, 1.86] | 1.99E-19 | 1.67    | [1.49, 1.86] | 2.59E-18 | 1.45    | [1.31, 1.6]  | 8.57E-12 | 1.3     | [1.16, 1.45]  | 3.29E-06 | 1.14    | [1.02, 1.27]  | 0.019   |
|                 | right | 1.63    | [1.46, 1.82] | 3.09E-17 | 1.62    | [1.45, 1.8]  | 5.83E-16 | 1.36    | [1.21, 1.52] | 1.25E-07 | 1.22    | [1.08, 1.36]  | 7.34E-04 | 1.11    | [1.00, 1.23]  | 0.051   |
| PDFF_pancreas   | left  | 1.42    | [1.27, 1.6]  | 9.93E-09 | 1.4     | [1.25, 1.58] | 7.49E-08 | 1.36    | [1.2, 1.55]  | 2.90E-06 | 1.23    | [1.07, 1.42]  | 3.20E-03 | 1.07    | [0.93, 1.25]  | 0.301   |
|                 | right | 1.38    | [1.22, 1.55] | 2.46E-07 | 1.36    | [1.21, 1.54] | 1.37E-06 | 1.32    | [1.15, 1.51] | 8.56E-05 | 1.2     | [1.03, 1.38]  | 1.47E-02 | 1.09    | [0.95, 1.25]  | 0.211   |
| Renal Sinus fat | left  | 1.26    | [1.12, 1.42] | 1.10E-04 | 1.23    | [1.09, 1.39] | 6.00E-04 | 1.2     | [1.05, 1.35] | 6.38E-03 | 1.15    | [1.00, 1.32]  | 4.64E-02 | 1.07    | [0.93, 1.25]  | 0.359   |
|                 | right | 1.15    | [1.02, 1.3]  | 1.83E-02 | 1.13    | [1, 1.27]    | 5.62E-02 | 1.08    | [0.95, 1.23] | 2.39E-01 | 1.03    | [0.9, 1.19]   | 6.56E-01 | 0.98    | [0.95, 1.25]  | 0.759   |
| Epicardial fat  | left  | 0.35    | [0.24, 0.46] | 2.87E-09 | 0.35    | [0.23, 0.46] | 1.11E-08 | 0.33    | [0.20, 0.45] | 3.51E-07 | 0.24    | [0.10, 0.37]  | 5.57E-04 | 0.04    | [-0.09, 0.17] | 0.555   |
|                 | right | 0.24    | [0.13, 0.36] | 5.74E-05 | 0.23    | [0.11, 0.35] | 1.62E-04 | 0.18    | [0.05, 0.31] | 7.80E-03 | 0.08    | [-0.06, 0.21] | 2.73E-01 | 0.06    | [-0.19, 0.06] | 0.341   |
| Pericardial fat | left  | 0.38    | [0.28, 0.48] | 6.38E-13 | 0.37    | [0.27, 0.47] | 8.96E-12 | 0.33    | [0.22, 0.44] | 6.26E-09 | 0.24    | [0.12, 0.35]  | 8.40E-05 | 0.01    | [-0.11, 0.10] | 0.918   |

|  |       |      |                 |          |     |                 |          |      |                 |          |      |                 |          |   |                   |       |
|--|-------|------|-----------------|----------|-----|-----------------|----------|------|-----------------|----------|------|-----------------|----------|---|-------------------|-------|
|  | right | 0.32 | [0.22,<br>0.42] | 3.02E-09 | 0.3 | [0.20,<br>0.41] | 4.25E-08 | 0.23 | [0.12,<br>0.35] | 1.03E-04 | 0.13 | [0.01,<br>0.25] | 2.98E-02 | - | [ -0.13,<br>0.07] | 0.536 |
|--|-------|------|-----------------|----------|-----|-----------------|----------|------|-----------------|----------|------|-----------------|----------|---|-------------------|-------|
